# Supplementary material for: Kukoamine B from Lycii Radicis Cortex Protects Human Keratinocyte HaCaT Cells through Covalent Modification by Trans-2-Nonenal
Source: MDPI journal article supplement (doi:10.3390/plants12010163), 2022-12-29
Supplement: s1 [file s1]

## Supplementary Material

# **Kukoamine B from Lycii Radicis Cortex protects human keratinocytes HaCaT cells through covalent modification by *trans*-2-nonenal**

Hye Mi Kim<sup>1</sup>, Jae-Yong Kim<sup>1</sup>, Ji Hoon Kim<sup>1</sup> and Chul Young Kim<sup>1,\*</sup>

<sup>1</sup>College of Pharmacy and Institute of Pharmaceutical Science and Technology, Hanyang University, Ansan, Gyeonggi-do 15588, Republic of Korea

\*Corresponding author : Chul Young Kim

E-mail address: chulykim@hanyang.ac.kr

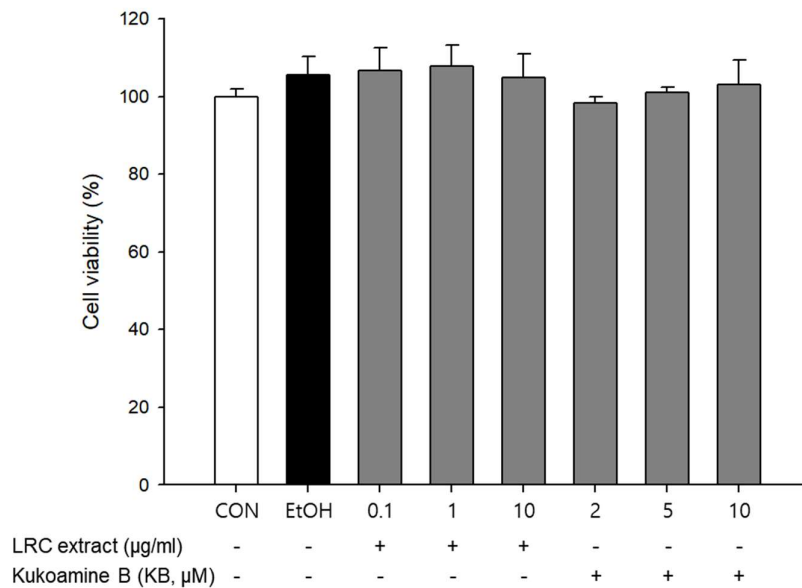

**Figure S1.** Cell viability of human keratinocytes treated with LRC extract (0.1, 1, 10 µg/ml) or KB (2, 5, 10 µM). These data are expressed as mean  $\pm$  SD of three independent experiments.

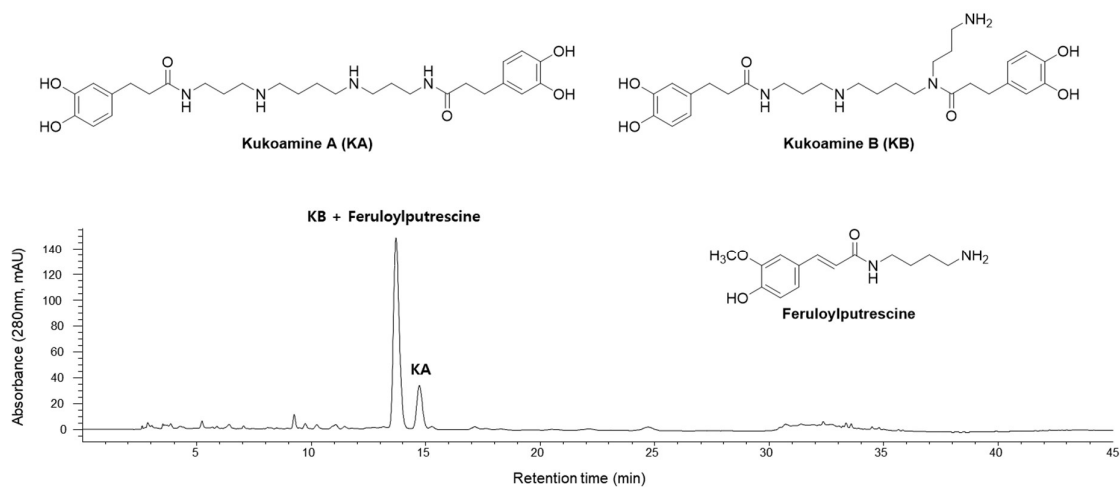

**Figure S2.** The HPLC chromatogram monitored at 280 nm of the LRC extract (10 mg/ml) dissolved in PBS.

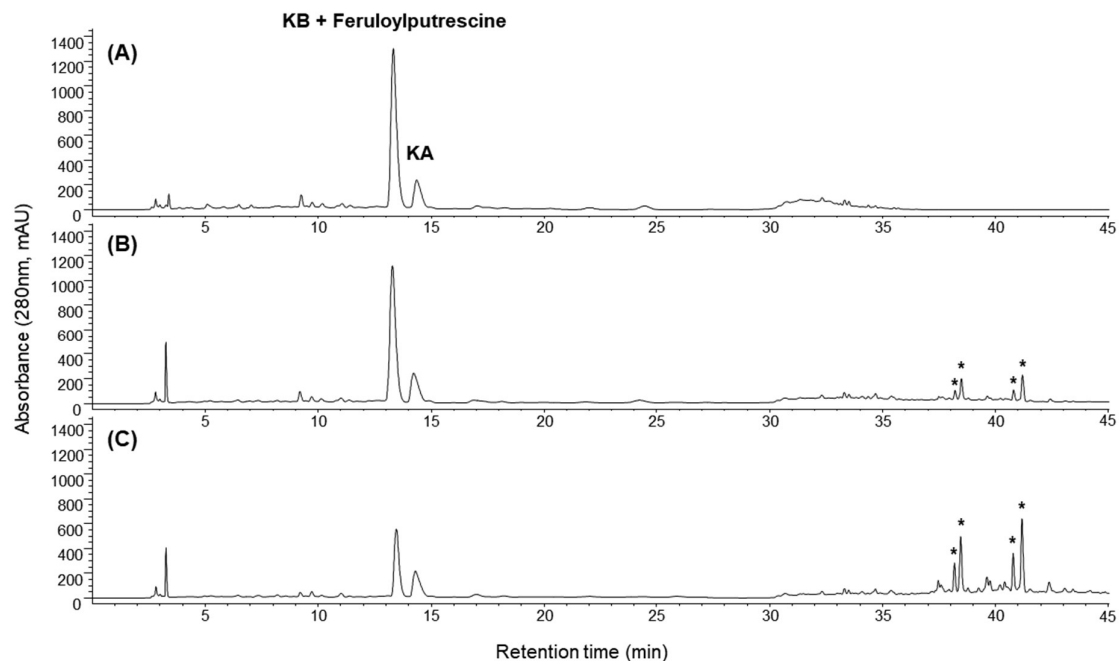

**Figure S3.** The HPLC chromatogram of LRC extract (100 mg/ml) after incubation with (A) 0.1 mM, (B) 50 mM, and (C) 100 mM of *trans*-2-nonenal for 24 h. The peaks designated as asterisk (\*) were new product peaks appeared though this reaction.

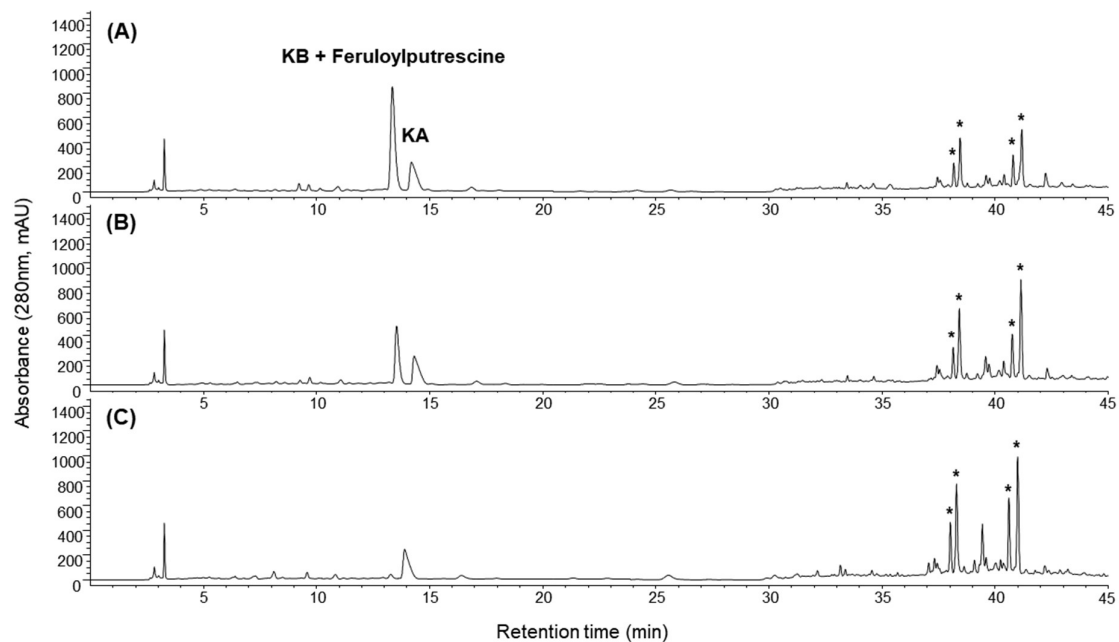

**Figure S4.** The HPLC chromatogram of LRC extract (100 mg/ml) after incubation with 100 mM of *trans*-2-nonenal for (A) 24 h, (B) 48 h, and (C) 72 h, respectively. The peaks designated as asterisk (\*) were new product peaks appeared though this reaction.



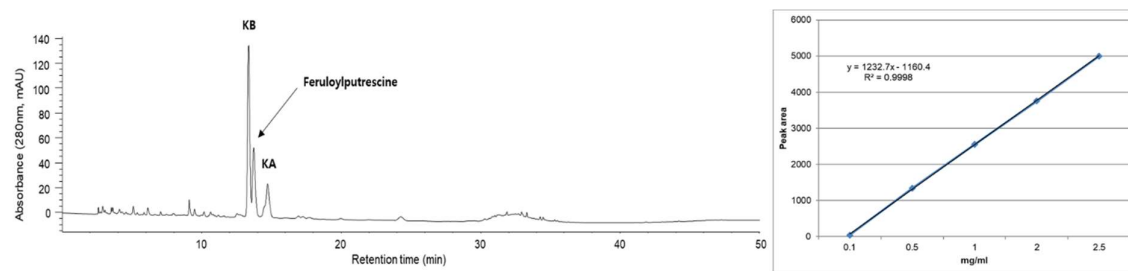

**Figure S8.** HPLC-UV profiles of the extracts and calibration curve of KB ( $R^2=0.9998$ ).
